# Supplementary material for: Upregulation of large myelin protein zero leads to Charcot–Marie–Tooth disease-like neuropathy in mice
Source: PubMed Central journal article supplement (PMC7070019; doi:10.1038/s42003-020-0854-z), 2020-03-13
Supplement: 42003_2020_854_MOESM2_ESM.pdf [file 42003_2020_854_MOESM2_ESM.pdf]

## **Description of additional supplementary items**

### **Supplementary Data 1**

The source data underlying plots of Figs. 1–8 and Supplementary Figs. 3–5, 8, 9.

### **Supplementary Movie 1**

Recorded video of tail suspension test of WT mouse during 1–2 min after start.

### **Supplementary Movie 2**

Recorded video of tail suspension test of WT mouse during 4–5 min after start.

### **Supplementary Movie 3**

Recorded video of tail suspension test of Het mouse during 1–2 min after start.

### **File Name: Supplementary Movie 4**

Recorded video of tail suspension test of Het mouse during 4–5 min after start.

### **File Name: Supplementary Movie 5**

Recorded video of tail suspension test of Hom mouse during 1–2 min after start.

### **File Name: Supplementary Movie 6**

Recorded video of tail suspension test of Hom mouse during 4–5 min after start.
